# Supplementary material for: Electron delocalization in single-layer phthalocyanine-based covalent organic frameworks: a first principle study
Source: Royal Society of Chemistry journal article supplement (doi:10.1039/c9ra05159g), 2019-01-01
Supplement: c9ra05159g1.pdf [file c9ra05159g1.pdf]

## Supplementary Information

### Electron Delocalization in Single-Layer Phthalocyanine-Based Covalent Organic Frameworks: A First Principle Study

Hung Q. Pham,<sup>\*,a,c</sup> Dong Q. Le,<sup>a</sup> Nguyen-Nguyen Pham-Tran,<sup>\*,a,b</sup> Yoshiyuki Kawazoe,<sup>d,e</sup> Duc Nguyen-Manh<sup>f</sup>

<sup>a</sup> Faculty of Chemistry, University of Science, VNU-HCM, Ho Chi Minh City, Vietnam.

<sup>b</sup> Institute for Computational Science and Technology, Ho Chi Minh City, Vietnam.

<sup>c</sup> Current address: Department of Chemistry, Chemical Theory Center, and Supercomputing Institute, University of Minnesota, 207 Pleasant Street SE, Minneapolis, Minnesota 55455, United States.

<sup>d</sup> New Industry Creation Hatchery Center, Tohoku University, Sendai, 980-8579, Japan.

<sup>e</sup> SRM Institute of Science and Technology, Chennai, India.

<sup>f</sup> Culham Centre for Fusion Energy, Culham Science Centre, Abingdon, Oxon, OX14 3DB, United Kingdom.

#### Table of Contents

|             |                                                                                                            |    |
|-------------|------------------------------------------------------------------------------------------------------------|----|
| Section S1: | The optimized basis set for Mo .....                                                                       | 2  |
| Section S2: | Fitting parameters for the deformation potential calculation .....                                         | 5  |
| Section S3: | Calculated Geometric Parameters .....                                                                      | 6  |
| Section S4: | Thermodynamic Quantities .....                                                                             | 7  |
| Section S6: | Intrinsic Charge Mobility for MoS <sub>2</sub> .....                                                       | 7  |
| Section S7: | Intrinsic Charge Mobility Calculation for Single-layer NiPc-P, NiPc-2P, and NiPc-3P .....                  | 10 |
| Section S8: | Intrinsic Charge Mobility Calculation for One-dimensional structures of NiPc-P, NiPc-2P, and NiPc-3P ..... | 12 |
| Section S9: | In-plane stiffness Calculation for Graphene and Pc-P .....                                                 | 14 |

## Section S1: The optimized basis set for Mo

Original basis set was taken from the reference:

[http://www.tcm.phy.cam.ac.uk/~mdt26/basis\\_sets/Mo\\_basis.txt](http://www.tcm.phy.cam.ac.uk/~mdt26/basis_sets/Mo_basis.txt)

MOLYBDENUM BASIS SETS FOR THE CRYSTAL PROGRAM

=====

TCM CRYSTAL basis set library: <http://www.tcm.phy.cam.ac.uk/~mdt26/crystal.html>

Title: Molybdenum Mo/Mo<sup>2+</sup> all-electron

Author: M.D. Towler

When: May 1995

Use: Never used - optimization in atom only

Comment: Remove outer diffuse Gaussian(s) and reoptimize valence functions  
for crystals

Results:

|                   | TOTAL HF ENERGY | KINETIC ENERGY | VIRIAL THEOREM |
|-------------------|-----------------|----------------|----------------|
| Mo atom (5D)      | -3975.3933041   | 3975.0492866   | -2.0000865442  |
| (Roetti/Clementi) | -3975.4280      |                | -2.0000422     |
| difference        | +0.0346 Hartree |                |                |

|                      |              |               |
|----------------------|--------------|---------------|
| Mo <sup>2+</sup> ion | -3974.717659 | -2.0000544997 |
|----------------------|--------------|---------------|

NB: Atomic energies refer to 5s<sup>2</sup>,4d<sup>4</sup> configuration

NB: Mo<sup>2+</sup> basis is same as atom with last three free Gaussian functions removed

NB: In semi-ionic situations it is possibly better to remove only the  
last two Gaussians from the atomic basis, leaving the shell with  
exponent 0.1424.

Mo atom

=====

THIS BASIS SET HAS BEEN DEVELOPED FOR THE FREE ATOM CASE AND SHOULD BE  
CONSIDERED A \*STARTING POINT\* FOR SOLID-STATE CALCULATIONS. REMOVE  
ANY DIFFUSE FUNCTIONS (EXPONENTS LESS THAN AROUND 0.1) AND REOPTIMIZE THE  
REMAINING EXPONENTS/CONTRACTION COEFFICIENTS OF THE VALENCE FUNCTIONS IN  
THE SITUATION OF INTEREST USING e.g. BILLY or LOPTCG. PLEASE SUMMARIZE  
RESULTS TO mdt26 at phy.cam.ac.uk

42 11

0 0 9 2.0 1.0

2803592.825747 0.00005

444817.867538 0.000355

97623.996506 0.00215

24043.681147 0.0112

6747.518431 0.0473

2131.383958 0.1567

752.716925 0.3532

293.984852 4244

120.908020 0.1667  
 0 1 7 8.0 1.0  
 8300.696289 -0.000336 0.001  
 1904.293335 -0.00655 0.00936  
 572.519470 -0.0576 0.0567  
 198.596466 -0.1475 0.2205  
 77.368034 0.2011 0.4589  
 33.814167 0.6759 0.4095  
 15.491380 0.3038 0.1253  
 0 1 6 8.0 1.0  
 180.935425 0.00529 -0.0139  
 66.122765 -0.0394 -0.0723  
 27.487516 -0.3338 0.0737  
 11.638353 0.1347 0.9517  
 5.152159 0.9806 1.2527  
 2.264732 0.2897 0.3209  
 0 3 6 10.0 1.0  
 293.95 0.00793  
 87.2824 0.0589  
 32.1457 0.218  
 12.9741 0.4242  
 5.3868 0.4127  
 2.211 0.1305  
 0 1 3 8.0 1.0  
 4.4173 -2.8714 -0.0766  
 1.9173 0.2991 0.52  
 0.8516 7.9229 1.0991  
 0 1 1 0.0 1.0  
 0.3534 1.0 1.0  
 0 3 3 4.0 1.0  
 3.0946 0.1237  
 1.1746 0.4234  
 0.4578 0.5112  
 0 3 1 0.0 1.0  
 0.1781 1.0  
 0 1 1 2.0 1.0  
 0.1424 1.0 1.0  
 0 1 1 0.0 1.0  
 0.0623 1.0 1.0  
 0 1 1 0.0 1.0  
 0.027 1.0 1.0

Our optimized basis set:

42 10  
 0 0 9 2.0 1.0  
 2803592.825747 0.00005

444817.867538 0.000355  
 97623.996506 0.00215  
 24043.681147 0.0112  
 6747.518431 0.0473  
 2131.383958 0.1567  
 752.716925 0.3532  
 293.984852 0.4244  
 120.908020 0.1667  
 0 1 7 8.0 1.0  
 8300.696289 -0.000336 0.001  
 1904.293335 -0.00655 0.00936  
 572.519470 -0.0576 0.0567  
 198.596466 -0.1475 0.2205  
 77.368034 0.2011 0.4589  
 33.814167 0.6759 0.4095  
 15.491380 3038 0.1253  
 0 1 6 8.0 1.0  
 180.935425 0.00529 -0.0139  
 66.122765 -0.0394 -0.0723  
 27.487516 -0.3338 0.0737  
 11.638353 0.1347 0.9517  
 5.152159 0.9806 1.2527  
 2.264732 0.2897 0.3209  
 0 3 6 10.0 1.0  
 293.95 0.00793  
 87.2824 0.0589  
 32.1457 0.218  
 12.9741 0.4242  
 5.3868 0.4127  
 2.211 0.1305  
 0 1 3 8.0 1.0  
 4.4173 -2.8714 -0.0766  
 1.9173 0.2991 0.52  
 0.8516 7.9229 1.0991  
 0 1 1 0.0 1.0  
 0.3534 1.0 1.0  
 0 3 3 4.0 1.0  
 3.0946 0.1237  
 1.1746 0.4234  
 0.4578 0.5112  
 0 3 1 0.0 1.0  
 0.1781 1.0  
 0 0 1 2.0 1.0  
 0.1098 1.0  
 0 2 1 0.0 1.0  
 0.1424 1.0

## Section S2: Fitting parameters for the deformation potential calculation

In our calculation, the relaxation-time  $\tau$  is assumed to be primarily by the acoustic phonon. The in-plane stiffness is calculated by fitting the total energy per unit cell to a quadratic function of the longitudinal strain:

$$\Delta E = E - E_o = \frac{1}{2} S_o C_{2D} \times \left(\frac{\Delta l}{l_o}\right)^2 \quad \text{for 2D systems}$$

$$\Delta E = E - E_o = \frac{1}{2} l_o C_{1D} \times \left(\frac{\Delta l}{l_o}\right)^2 \quad \text{for 1D systems}$$

where  $S_o$  and  $l_o$  are the area and the length of the optimized structures for 2D and 1D systems, respectively. The 2D and 1D stiffness are then calculated from the coefficient of the quadratic fitting curves:

$$C_{2D} = 2 \times \text{coefficient}/S_o \quad \text{for 2D systems}$$

$$C_{1D} = 2 \times \text{coefficient}/l_o \quad \text{for 1D systems}$$

The unit for  $C^{2D}$  and  $C^{1D}$  are  $\text{J/m}^2$  and  $\text{J/m}$ , respectively.

The DP constant  $E_1$  is calculated in a similar manner. Here, the band edge (VBM or CBM) is also a function of the longitudinal strain:

$$E^{VBM} = E_o^{VBM} + E_1 \times \frac{\Delta l}{l_o} \quad \text{for hole conduction}$$

$$E^{CBM} = E_o^{CBM} + E_1 \times \frac{\Delta l}{l_o} \quad \text{for electron conduction}$$

The effective mass for hole (or electron) is calculated by fitting the valance band (or conduction band) energy to a parabolic function:

$$\varepsilon(\vec{k}) = \varepsilon_o + \frac{\hbar^2}{2m^*} k^2$$

It should be noted that effective mass is a tensor and its value will depend on the direction of fitting. To calculate the intrinsic carrier mobility under DP scheme, the fitting of band energy should be performed in the direction of the strain. Moreover, in our procedure we limit the strain  $\Delta l/l_o$  in the range of 5% for stiffness and 1% for DP constant calculation. For effective mass, the wavevector  $k$  is limited in the range of  $0.05 \text{ Bohr}^{-1}$  around the extrema of the bands. These fitting thresholds produce reasonable results and allow one to avoid the uncertainty of DP scheme.<sup>1</sup> More details about theoretical prediction on carrier mobility of organic-nano materials can be found in the previous literature.<sup>2-4</sup>

### Section S3: Calculated Geometric Parameters

**Table S1.** Lattice constants and fractional coordinates of the irreducible atoms (Space group P4/mmm, No. 123) for the single-layer NiPc-P, NiPc-2P, and NiPc-3P.

| <b>NiPc-P</b><br>a = 10.591 Å |         |         | <b>NiPc-2P</b><br>a = 13.040 Å |         |         | <b>NiPc-3P</b><br>a = 15.482 Å |         |         |
|-------------------------------|---------|---------|--------------------------------|---------|---------|--------------------------------|---------|---------|
|                               | x       | y       |                                | x       | y       |                                | x       | y       |
| C                             | 0.60480 | 0.75876 | C                              | 0.09401 | 0.60891 | H                              | 0.00000 | 0.66015 |
| C                             | 0.88972 | 0.56637 | C                              | 0.58534 | 0.71041 | H                              | 0.15892 | 0.66196 |
| C                             | 0.00000 | 0.63627 | C                              | 0.81685 | 0.55412 | C                              | 0.00000 | 0.59004 |
| H                             | 0.00000 | 0.73838 | C                              | 0.00000 | 0.55549 | C                              | 0.07867 | 0.54674 |
| N                             | 0.72431 | 0.72431 | H                              | 0.09472 | 0.69197 | C                              | 0.15830 | 0.59198 |
| N                             | 0.50000 | 0.68157 | N                              | 0.68231 | 0.68231 | C                              | 0.57196 | 0.67733 |
| Ni                            | 0.50000 | 0.50000 | N                              | 0.50000 | 0.64791 | C                              | 0.76704 | 0.54582 |
|                               |         |         | Ni                             | 0.50000 | 0.50000 | N                              | 0.65362 | 0.65362 |
|                               |         |         |                                |         |         | N                              | 0.50000 | 0.62476 |
|                               |         |         |                                |         |         | Ni                             | 0.50000 | 0.00000 |

**Table S2.** Lattice constants and fractional coordinates of the irreducible atoms (Space group P6/mmm, No. 191) for the single-layer Boroxine-COF, Boronate-COF, Triazine-COF, and CS-COF

| <b>Boroxine</b><br>a = 15.067 Å |          |          | <b>Boronate</b><br>a = 21.606 Å |          |          | <b>Triazine</b><br>a = 14.498 Å |          |          |
|---------------------------------|----------|----------|---------------------------------|----------|----------|---------------------------------|----------|----------|
|                                 | x        | y        |                                 | x        | y        |                                 | x        | y        |
| H                               | -0.40519 | -0.31101 | H                               | -0.43366 | -0.36810 | H                               | -0.40223 | -0.30368 |
| C                               | 0.44694  | 0.05286  | O                               | -0.34718 | 0.19954  | C                               | 0.44457  | 0.05483  |
| B                               | 0.22602  | -0.38699 | C                               | 0.46288  | 0.03685  | C                               | 0.22865  | -0.38568 |
| O                               | -0.28087 | 0.28087  | C                               | -0.33296 | 0.26953  | N                               | -0.27901 | 0.27901  |
| C                               | -0.10778 | 0.44611  | B                               | 0.15669  | -0.42165 | C                               | -0.11108 | 0.44446  |
|                                 |          |          | C                               | -0.07496 | 0.46252  |                                 |          |          |

| <b>CS-COF</b><br>a = 16.511 Å |          |          |
|-------------------------------|----------|----------|
|                               | x        | y        |
| H                             | -0.34865 | -0.34865 |
| C                             | -0.41411 | -0.41411 |
| N                             | -0.33184 | 0.16634  |
| C                             | 0.49844  | 0.08386  |
| C                             | -0.33399 | 0.24450  |

## Section S4: Thermodynamic Quantities

For entropy calculation in CRYSTAL09, only vibrational degree of freedom is considered in partition function since unlike molecules solid systems are not allowed to rotate and translate. The vibration contributions were taken from the phonon calculations.

**Table S3.** Thermodynamic quantities at 1 atm at different temperatures for formation reactions

| Temp |                | $\Delta S$ (cal/mol.K) | $\Delta H$ (kcal/mol) | $\Delta G$ (kcal/mol) |
|------|----------------|------------------------|-----------------------|-----------------------|
| 350  | <b>NiPc-P</b>  | -180                   | -303                  | -240                  |
|      | <b>NiPc-2P</b> | -186                   | -288                  | -223                  |
|      | <b>NiPc-3P</b> | -193                   | -281                  | -213                  |
| 450  | <b>NiPc-P</b>  | -183                   | -304                  | -222                  |
|      | <b>NiPc-2P</b> | -189                   | -289                  | -204                  |
|      | <b>NiPc-3P</b> | -196                   | -282                  | -194                  |
| 500  | <b>NiPc-P</b>  | -184                   | -305                  | -213                  |
|      | <b>NiPc-2P</b> | -190                   | -289                  | -194                  |
|      | <b>NiPc-3P</b> | -197                   | -282                  | -184                  |

## Section S6: Intrinsic Charge Mobility for MoS<sub>2</sub>

We apply the same approach as reported in the Cai and coworker's paper<sup>4</sup> to single-layer trigonal prismatic MoS<sub>2</sub>. Our calculated band structure from a local Gaussian basis agrees well with their plane wave calculation. It should be noted that the band dispersions are identical irrespective of the exchange-correlation functional used (PBE or B3LYP) even though the band gap are functional dependent. The indirect and direct bandgap by PBE are 1.61 eV (between  $\Gamma$  and M) and 1.73 eV (at K point), respectively. These are in an excellent agreement with the value calculated by the plane wave calculation. The indirect and direct bandgap by B3LYP are 2.26 and 2.44 eV. The previous study shows that bandgap should be direct at K point, while we predict an indirect bandgap at  $\Gamma$  and M point. However, this discrepancy is negligible (0.1 eV) and can be attributed to the perturbation in the lattice constants observed in the previous literature.<sup>5</sup> To ensure the consistency, we consider the mobility calculation around the K point. Since mobility of MoS<sub>2</sub> are isotropic with respect to the lattice vectors, only a strain along the a direction is calculated for the sake of comparison. From Table S4, the intrinsic charge carrier mobility for hole and electron are 421.74 and 116.94 cm<sup>2</sup>/V.s, respectively. These are approximately two times higher than the value of 200.52 and 72.16 cm<sup>2</sup>/V.s from Cai and coworker. Our calculation, however, are consistent with experimental measurement, which provides the optimal mobility in range of 200-500 cm<sup>2</sup>/Vs for the bulk MoS<sub>2</sub>.<sup>6</sup>

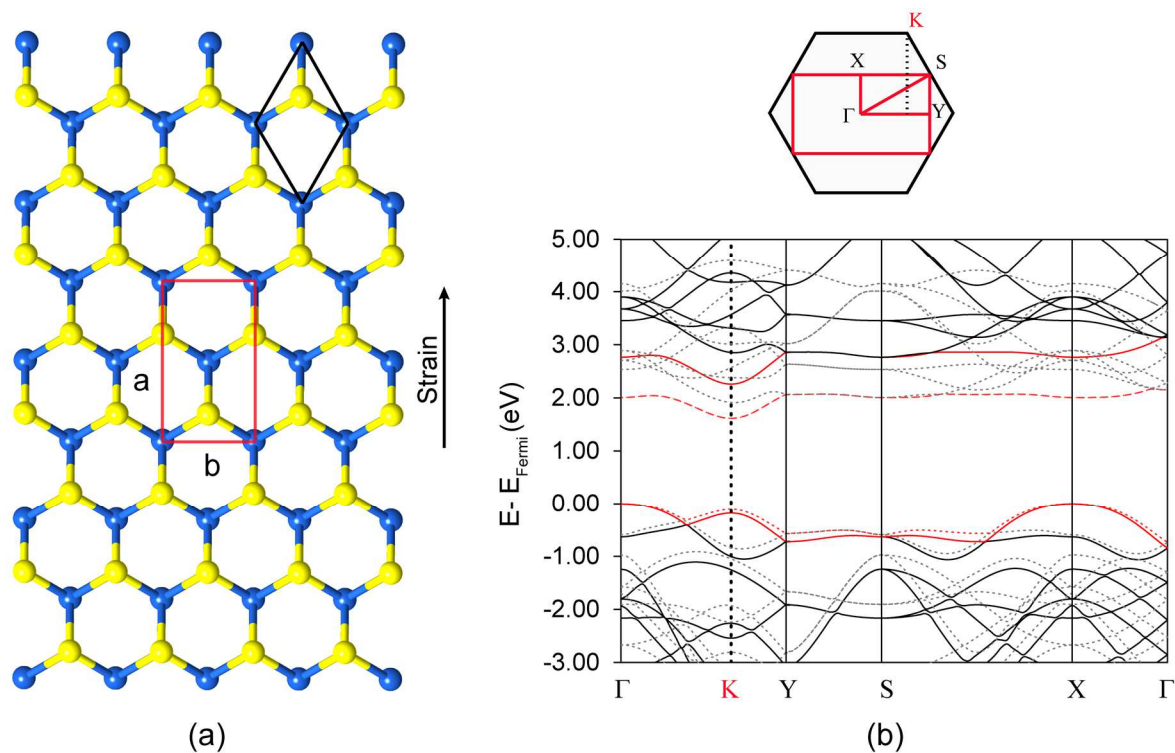

**Figure S4.** Single-layer structure of MoS<sub>2</sub> (a) and its electronic band structure (b) in the orthorhombic lattice. The top right panel depicts the mapping of K point in the hexagonal lattice onto its coordinate along  $\Gamma$ -Y in the orthorhombic lattice. The electronic band structure of MoS<sub>2</sub> sheet was calculated at the B3LYP (solid curves) and PBE (dashed curves) level of theory. The red curves are the band edges, i.e. VBM (lower) and CBM (upper). Atom colors: Mo, blue; S, yellow.

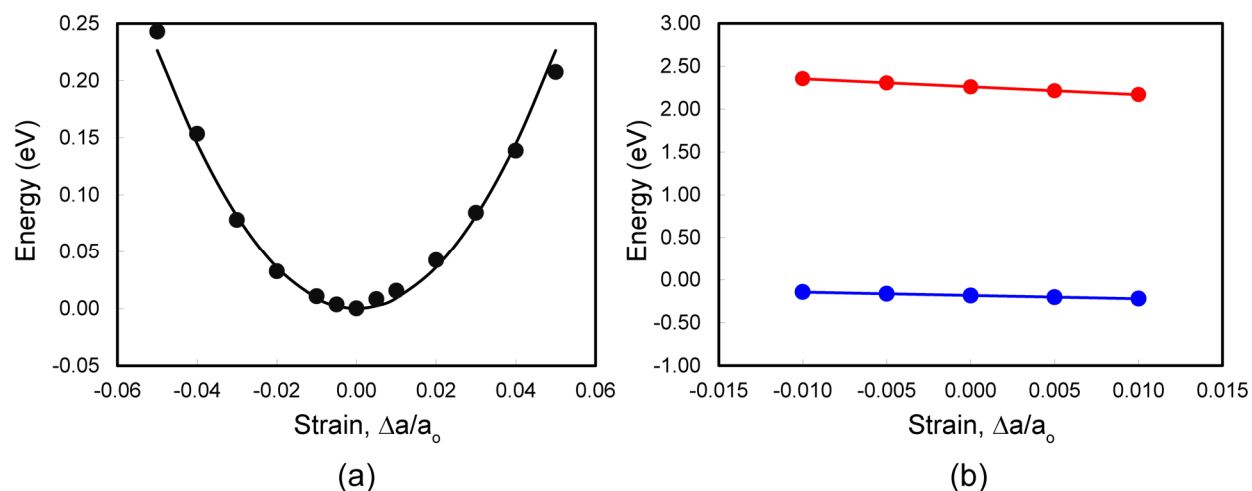

**Figure S5.** Relative energy per unit cell (a) and the shift of VB (blue) and CB (red) at K point (b) with respect to the strain along the a direction of single-layer MoS<sub>2</sub>. The dots are the calculated values and the solid curves are fitted to the calculated data to determine DP constant  $E_1$ , and in-plane stiffness  $C$ .

**Table S4.** DP constant  $E_1$ , in-plane stiffness  $C_{2D}$ , effective mass and intrinsic charge mobility for single-layer MoS<sub>2</sub>

|          | $E_1$ (eV) | $C_{2D}$ (J/m <sup>2</sup> ) | $m^*$ ( $m_e$ ) | $\mu$ , cm <sup>2</sup> /Vs |
|----------|------------|------------------------------|-----------------|-----------------------------|
| Electron | -9.21      | 160.04                       | 0.48            | 116.94                      |
| Hole     | -3.85      | 160.04                       | 0.60            | 421.74                      |

## Section S7: Intrinsic Charge Mobility Calculation for Single-layer NiPc-P, NiPc-2P, and NiPc-3P

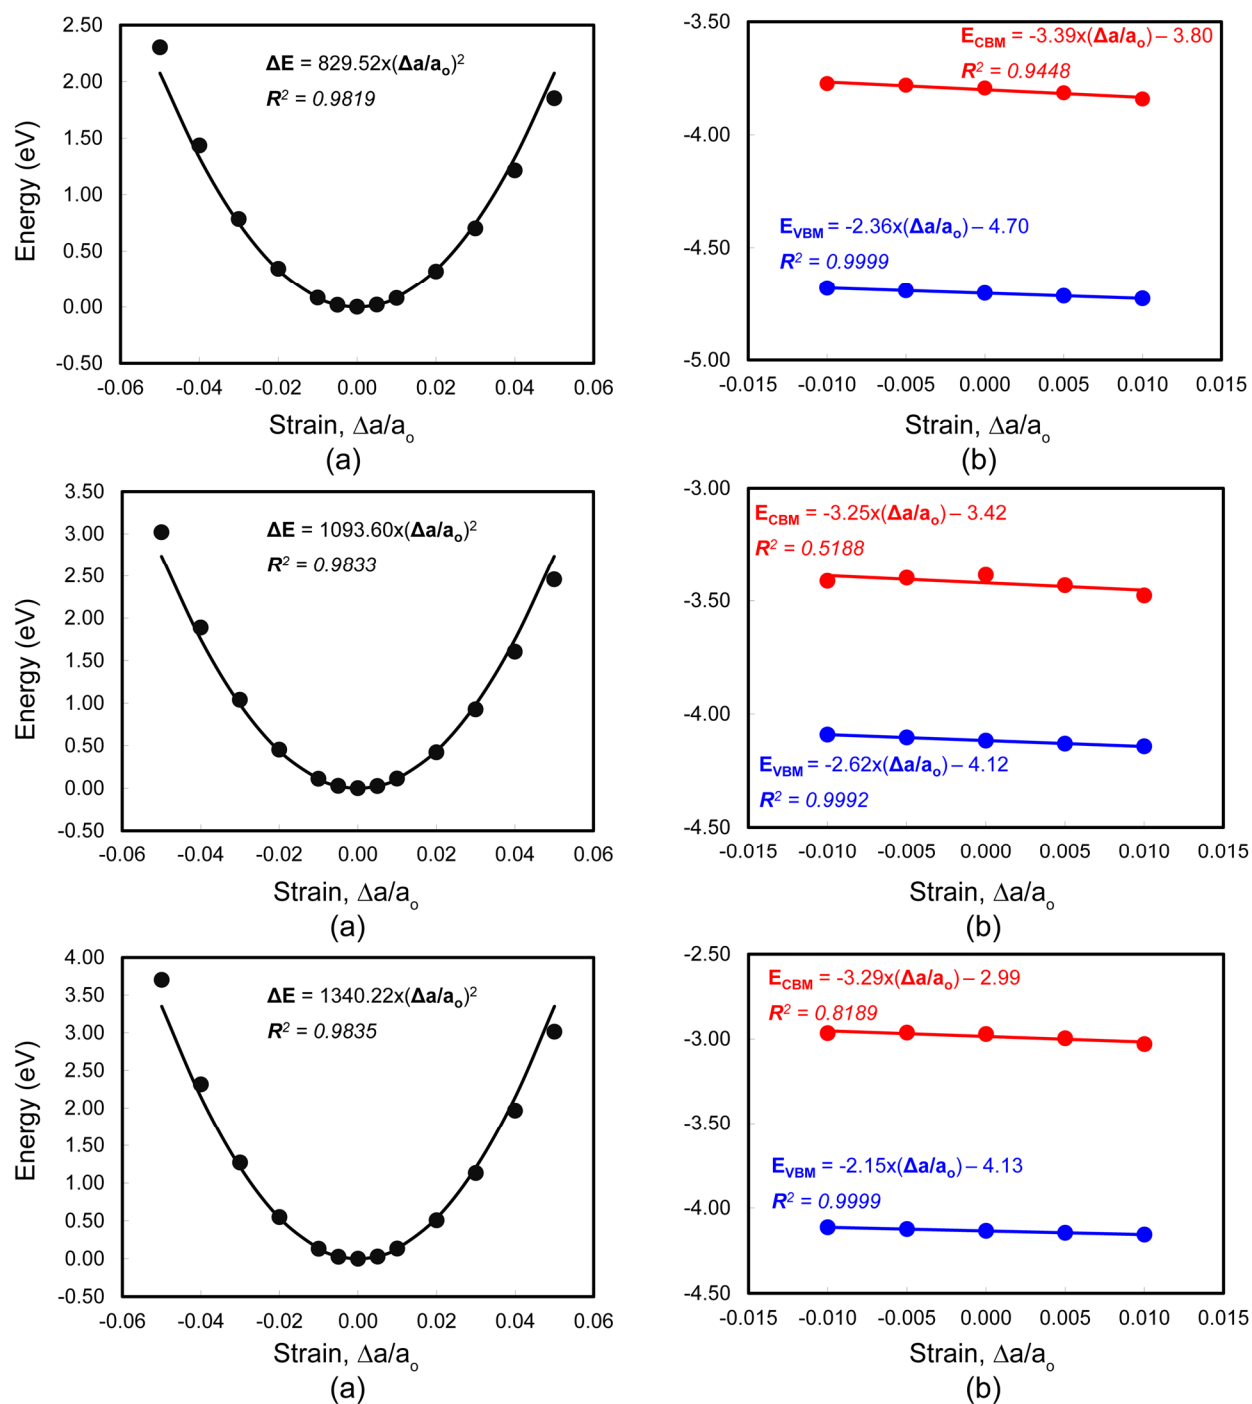

**Figure S6.** Relative energy per unit cell (left) and the shift of VBM and CBM (right) with respect to the strain along the *a* direction of single-layer NiPc-P (a, b), NiPc-2P (c, d), and NiPc-3P (e, f). The fitting curves and the coefficient of determination ( $R^2$ ) are also shown.

**Table S5.** DP constant  $E_1$ , in-plane stiffness  $C_{2D}$ , effective mass for single-layer NiPc-P, NiPc-2P, NiPc-3P

|         |          | $E_1$ (eV) | $C_{2D}$ (J/m <sup>2</sup> ) | $m^*$ ( $m_e$ ) |
|---------|----------|------------|------------------------------|-----------------|
| NiPc-P  | Electron | -3.39      | 236.97                       | 1.08            |
|         | Hole     | -2.36      | 236.97                       | 0.10            |
| NiPc-2P | Electron | -3.25      | 206.08                       | 0.82            |
|         | Hole     | -2.62      | 206.08                       | 0.13            |
| NiPc-3P | Electron | -3.29      | 179.18                       | 0.60            |
|         | Hole     | -2.15      | 179.18                       | 0.16            |

**Table S6.** Effective mass along M-  $\Gamma$  for single-layer NiPc-P, NiPc-2P, NiPc-3P

|         |          | $m^*$ ( $m_e$ ) |
|---------|----------|-----------------|
| NiPc-P  | Electron | 0.36            |
|         | Hole     | 0.09            |
| NiPc-2P | Electron | 0.31            |
|         | Hole     | 0.12            |
| NiPc-3P | Electron | 0.30            |
|         | Hole     | 0.14            |

## Section S8: Intrinsic Charge Mobility Calculation for One-dimensional structures of NiPc-P, NiPc-2P, and NiPc-3P

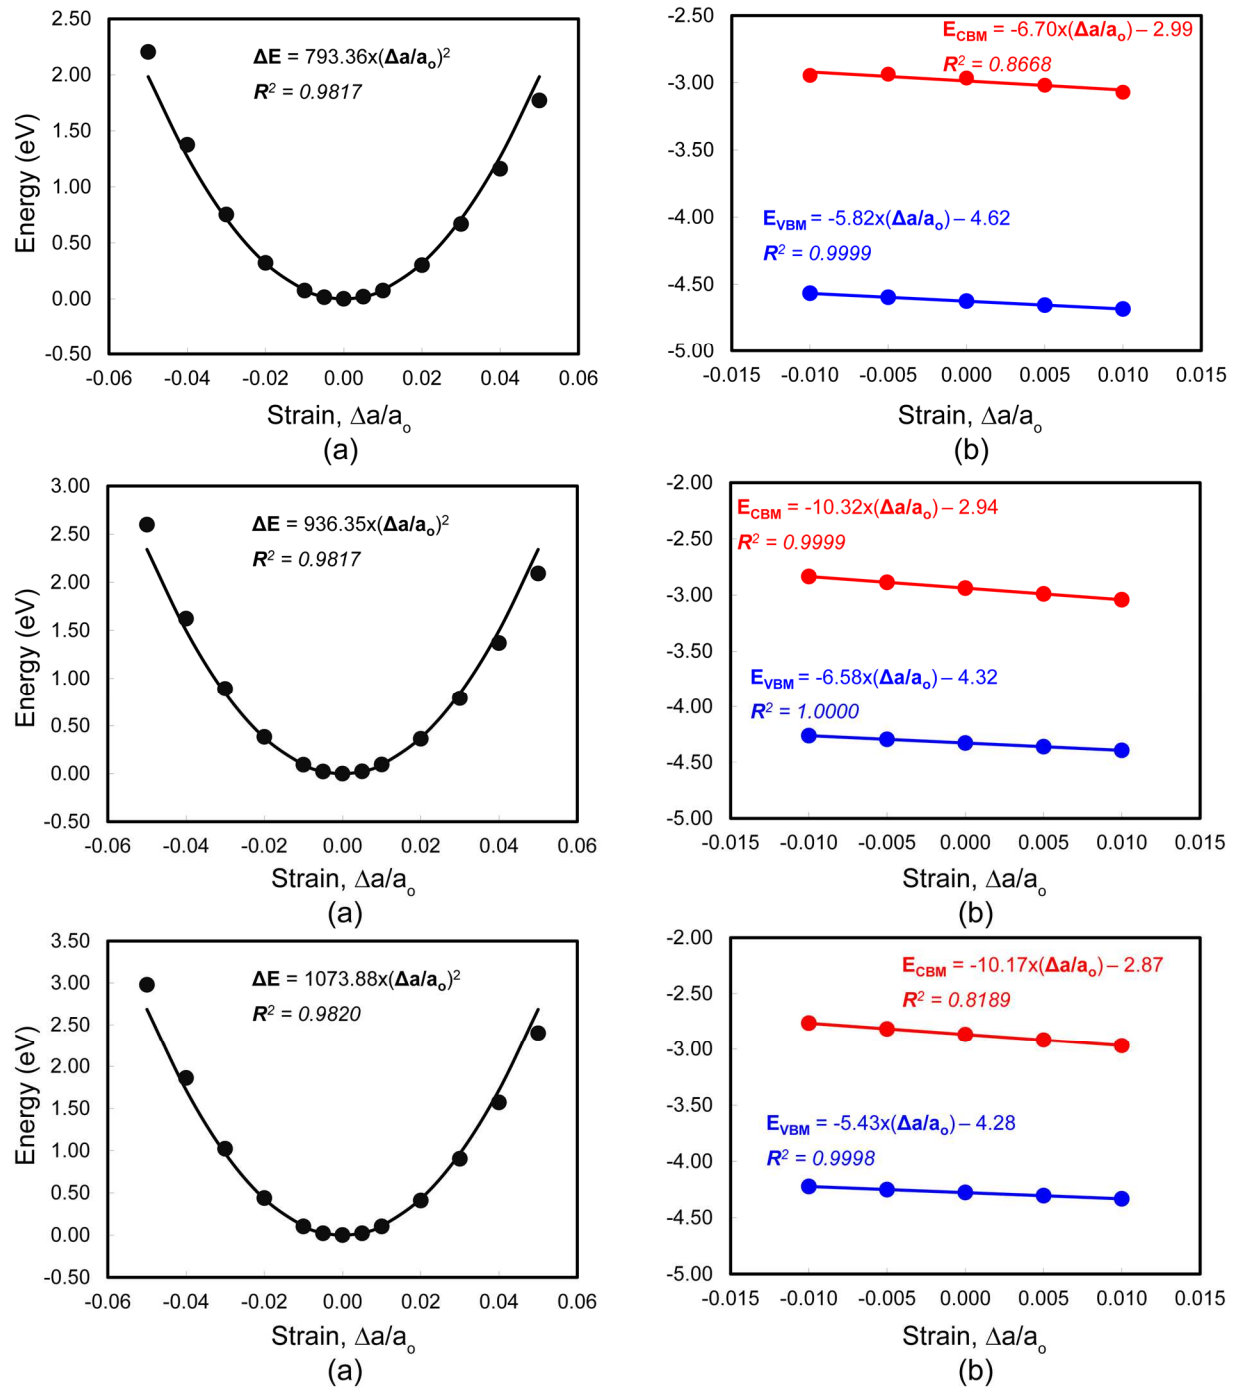

**Figure S9.** Relative energy of one unit cell (left) and the shift of VBM and CBM (right) with respect to the strain along the a direction of one dimensional structures of NiPc-P (a, b), NiPc-2P (c, d), and NiPc-3P (e, f). The fitting curves and the coefficient of determination ( $R^2$ ) are also shown.

**Table S7.** DP constant  $E_1$ , in-plane stiffness  $C_{1D}$ , effective mass, and intrinsic charge mobility for NiPc-P, NiPc-2P, NiPc-3P ribbons

|         |          | $E_1$ (eV) | $C_{1D}$ ( $10^{-7}$ J/m) | $m^*$ ( $m_e$ ) | $\mu$ , $\text{cm}^2/\text{Vs}$ |
|---------|----------|------------|---------------------------|-----------------|---------------------------------|
| NiPc-P  | Electron | -6.70      | 2.40                      | 0.28            | 181.27                          |
|         | Hole     | -5.82      | 2.40                      | 0.15            | 619.09                          |
| NiPc-2P | Electron | -10.32     | 2.30                      | 0.85            | 13.58                           |
|         | Hole     | -6.58      | 2.30                      | 0.15            | 464.75                          |
| NiPc-3P | Electron | -10.17     | 2.22                      | 0.73            | 17.04                           |
|         | Hole     | -5.43      | 2.22                      | 0.14            | 683.86                          |

## Section S9: In-plane stiffness Calculation for Graphene and Pc-P

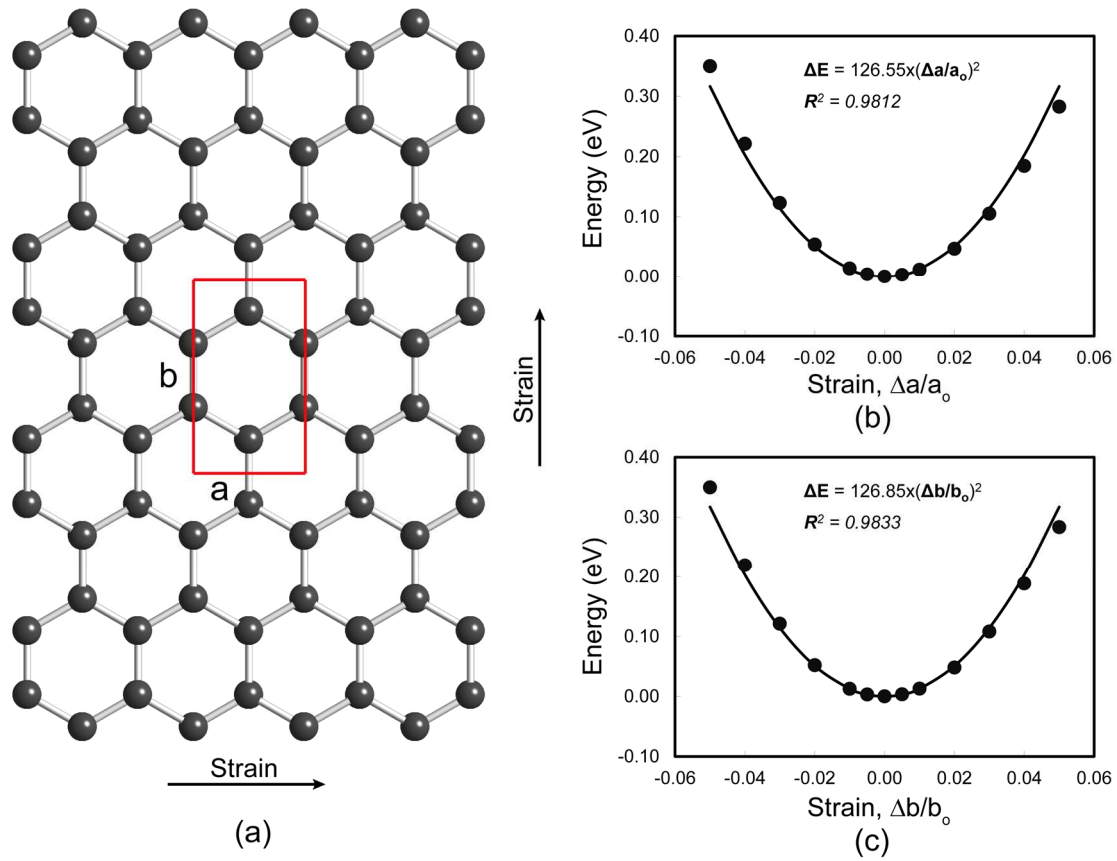

**Figure S10.** Single-layer structure of Graphene in the orthogonal unit cell (a) and the relative energy of one unit cell with respect to the strain along the  $a$  direction (b) and respect to the strain along the  $b$  direction (c).

**Table S8.** Calculated geometry and in-plane stiffness  $C_{2D}$  for Graphene

|                    |               |                         |
|--------------------|---------------|-------------------------|
| Lattice constants  | $a$           | 2.452 Å                 |
|                    | $b$           | 4.246 Å                 |
| In-plane stiffness | $a$ direction | 389.56 J/m <sup>2</sup> |
|                    | $b$ direction | 390.48 J/m <sup>2</sup> |

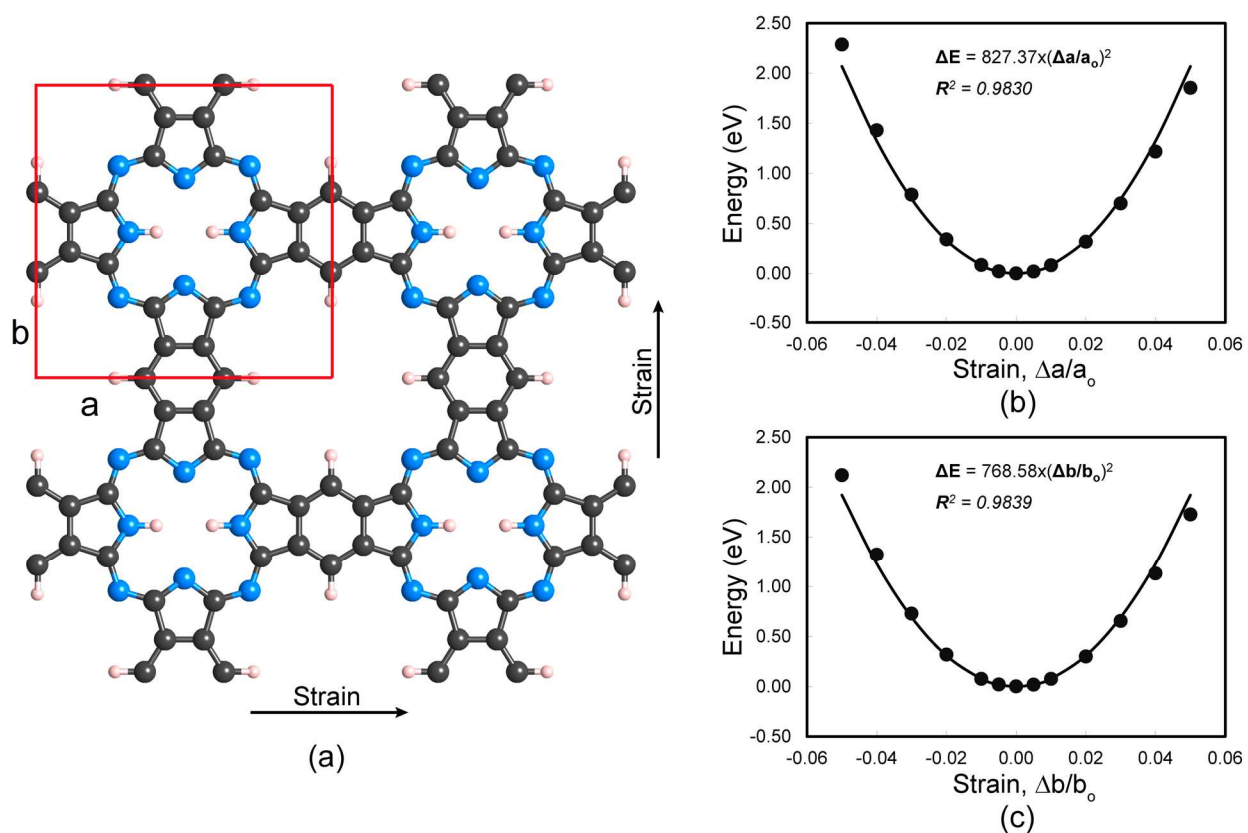

**Figure S11.** Single-layer structure of Pc-P (a) and the relative energy of one unit cell with respect to the strain along the a direction (b) and respect to the strain along the b direction (c). Atom colors: C, grey; N, blue; H, pink.

**Table S9.** Calculated geometry and in-plane stiffness  $C_{2D}$  for Pc-P

|                    |             |                         |
|--------------------|-------------|-------------------------|
| Lattice constants  | a           | 10.683 Å                |
|                    | b           | 10.664 Å                |
| In-plane stiffness | a direction | 232.72 J/m <sup>2</sup> |
|                    | b direction | 216.18 J/m <sup>2</sup> |

## Reference

1. J. Qiao, X. Kong, Z.-X. Hu, F. Yang and W. Ji, *Nat. Commun.*, 2014, **5**, 4475.
2. J. Xi, M. Long, L. Tang, D. Wang and Z. Shuai, *Nanoscale*, 2012, **4**, 4348.
3. M. Long, L. Tang, D. Wang, Y. Li and Z. Shuai, *ACS Nano*, 2011, **5**, 2593.
4. Y. Cai, G. Zhang and Y.-W. Zhang, *J. Am. Chem. Soc.*, 2014, **136**, 6269.
5. J. Feng, X. Qian, C.-W. Huang and J. Li, *Nat. Photonics*, 2012, **6**, 866.
6. R. Fivaz and E. Mooser, *Phys. Rev.*, 1967, **163**, 743.
